# Supplementary material for: Pecan agroforestry systems improve soil quality by stimulating enzyme activity
Source: PeerJ. 2022 Jan 4;10:e12663. doi: 10.7717/peerj.12663 (PMC8740511; doi:10.7717/peerj.12663)
Supplement: Supplemental Information 1 [file peerj-10-12663-s001.xlsx]

## Sheet: Sheet1
	soil layer （cm）	EC（ds/m）	MC（%）	BD（g/cm³）	TPO（%）	AP（mg/kg）	TP（g/kg）	NH4+-N（mg/kg）	NO3--N(mg/kg)	TK(g/kg)	AK（mg/kg）	TN(g/kg)	TC(g/kg)	pH	Ca(g/kg)	Mg(g/kg)	S-UE	S-AKP	S-PPO	S-CBH	S-NAG	S-POD	S-BG
PPH	0-20	1.35	17.45	1.44	45.66	9.254	1.636	1.045	3.72	2.7614	202.6	0.84	15.17	7.29	11.6122	3.887	903.74	10.31	12.29	4.44	7.28	3.91	163.58
	0-20	1.4	19.06	1.43	46.04	8.316	1.636	0.7	1.445	3.1734	223.3	0.9	15.79	8.03	12.8722	4.531	876.48	11.41	12.81	4.02	5.01	4.16	113.36
	0-20	1.28	18.93	1.42	46.42	12.39	1.876	0.325	1.85	3.5924	306.9	1.07	18.23	8.07	14.3622	4.718	901.44	10.6	11.57	4.93	7.49	5.74	111.81
PPS	0-20	1.27	19.2	1.55	41.51	12.075	2.2	1.04	0.88	4.1994	223.3	0.93	16.63	8.14	15.0722	5.448	1034.04	11.54	10	4.62	7.56	4.74	109.7
	0-20	1.28	20.05	1.53	42.26	9.954	2.18	0.04	2.04	3.7964	285.1	0.98	16.91	8.14	14.1422	5.147	945.19	12.31	9.26	6.41	6.81	5.74	138.76
	0-20	1.26	18.77	1.53	42.26	9.24	1.556	0.76	2.37	4.4544	162.7	0.9	16.09	8.22	15.5722	5.612	1076.69	11.3	10.01	5.25	7.06	4.24	146.84
PPL	0-20	1.35	18.69	1.45	45.28	8.904	2.08	0.34	8.705	3.5594	107.5	0.89	14.75	8.12	13.7622	4.731	912.76	10.63	10.44	11.67	2.94	4.57	20.25
	0-20	1.36	18.03	1.44	45.66	6.426	1.612	0.54	4.985	4.8339	62.5	0.83	14.77	8.18	12.3917	4.4031	997.15	11.93	11.57	8.14	2.46	2.25	21.99
	0-20	1.44	19.13	1.43	46.04	9.954	1.828	0.27	4.56	5.0139	65.1	0.88	14.59	8.04	12.0517	4.6131	1014.45	10.02	10.54	13.74	4	3.33	32.28
CK	0-20	1.2	16.9	1.52	42.64	8.904	1.556	0.035	2.515	4.8919	60.9	0.7	14.6	8.15	14.2217	4.5991	811.25	8.87	10.02	13.91	2.34	4.82	157.35
	0-20	1.21	18.82	1.47	44.53	8.316	1.032	0.245	3.37	3.4239	45.1	0.21	12.6	8.25	15.5117	3.9791	870.43	8.63	12.77	13.57	2.99	5.82	131.99
	0-20	1.25	17.16	1.5	43.4	3.066	1.28	0.13	1.685	4.6989	52.8	0.53	13.68	8.2	15.7917	4.7481	814.26	7.93	11.71	10.08	1.83	5.41	163.18
PPH	20-40	1.35	15.86	1.41	46.79	5.481	0.952	1.225	5.005	2.1694	192.4	0.36	12.03	8.01	16.7322	4.207	no data in these soil layers
	20-40	1.37	15.35	1.4	47.17	3.15	0.984	0.525	1.42	2.6104	147.8	0.31	11.98	8.31	16.7722	4.513
	20-40	1.27	16.67	1.39	47.55	2.1	1	0.92	2.045	2.7644	107.4	0.37	12.27	8.25	16.8822	4.552
PPS	20-40	1.28	20.57	1.71	35.47	1.155	1.1	0.29	0.585	4.8424	155.5	0.66	15.95	8.2	20.4822	5.877
	20-40	1.26	19.77	1.68	36.6	2.751	1.188	0.31	0.635	5.2594	134.2	0.59	17.28	8.24	23.1622	6.404
	20-40	1.23	20.06	1.67	36.98	2.667	1.16	0.36	0.48	4.5614	154	0.56	16.1	8.19	21.0122	6.138
PPL	20-40	1.57	17.22	1.53	42.26	1.785	1.288	0.56	11.42	3.2724	88.8	0.31	12.9	8.18	18.4322	4.669
	20-40	1.59	16.72	1.51	43.02	2.174	0.984	0.545	5.655	4.3009	139.8	0.42	13.87	8.14	17.1317	4.5421
	20-40	1.59	17.15	1.51	43.02	1.176	1.076	0.295	6.485	4.5379	130.4	0.52	12.74	8.11	15.8717	4.7111
CK	20-40	1.16	18.55	1.59	40	1.743	0.928	0.15	2.725	3.6839	27	0.35	13.52	8.33	17.1717	4.3291
	20-40	1.3	20.78	1.57	40.75	1.533	1.068	0.12	3.79	3.5229	25.6	0.24	11.93	8.41	18.1117	4.4051
	20-40	1.21	20.02	1.56	41.13	1.239	1.048	0.345	1.19	3.9769	32.7	0.27	12.93	8.29	18.5417	4.7451
PPH	40-60	1.31	16.14	1.02	61.51	3.276	0.928	0.65	3.235	1.7214	124.7	0.25	11.52	8.3	17.4722	4.208
	40-60	1.27	15.92	1.12	57.74	2.352	0.916	0.49	1.455	2.1174	117	0.2	11.48	8.39	16.7622	4.325
	40-60	1.23	14.2	1.09	58.87	1.134	1.04	0.665	1.72	2.6844	51.1	0.17	11.18	8.37	16.7622	4.524
PPS	40-60	1.33	24.13	1.68	36.6	0.714	1.096	0.225	0.305	4.7544	139.2	0.39	19.05	8.34	27.2822	6.452
	40-60	1.29	26.28	1.66	37.36	1.512	1.052	0.515	0.575	3.5224	105.6	0.3	19.7	8.3	26.8222	5.861
	40-60	1.29	24.54	1.65	37.74	1.512	1.164	0.135	0.8	6.0174	95	0.42	20.29	8.34	24.0622	7.358
PPL	40-60	1.52	21.76	1.38	47.92	1.239	1.2	0.37	11.015	3.6409	44.4	0.22	12.06	8.46	18.8417	4.5561
	40-60	1.59	17.73	1.37	48.3	1.344	0.816	0.275	7.07	2.5099	42.1	0.16	10.82	8.26	12.9217	3.0121
	40-60	1.57	17.78	1.37	48.3	1.386	1.196	0.18	11.2	4.3989	87.8	0.37	14.69	8.09	20.8617	5.0411
CK	40-60	1.31	23	1.55	41.51	0.859	0.912	0.185	2.065	3.1979	22.9	0.13	10.67	8.49	16.0417	3.9121
	40-60	1.28	19.7	1.6	39.62	0.651	0.88	0.015	3.375	3.6589	11.2	0.24	11.03	8.32	17.1917	4.4821
	40-60	1.32	21.59	1.62	38.87	1.239	0.98	0.285	1.405	3.2229	15.4	0.17	10.85	8.38	16.4417	4.0341
